# Supplementary material for: JAM-A associates with ZO-2, afadin, and PDZ-GEF1 to activate Rap2c and regulate epithelial barrier function
Source: PubMed Central journal article supplement — Mol Biol Cell. 2013 Sep 15;24(18):2849–60. doi: 10.1091/mbc.E13-06-0298 (PMC3771947; doi:10.1091/mbc.e13-06-0298), 2013-09-15
Supplement: supp_E13-06-0298_CombinedSupMats.pdf [file supp_E13-06-0298_CombinedSupMats.pdf]

# Supplemental Materials

*Molecular Biology of the Cell*

Monteiro et al.

## Supplemental Figures

**Figure S1:** Treatment of confluent T84 monolayers with  $\sigma 1$  for 3 hours led to significant reduction in TER when compared to cells treated with  $\sigma 1_{G381A}$  mutant. Either WT  $\sigma 1$  or  $\sigma 1_{G381A}$  (20  $\mu\text{g/ml}$ ) was added to apical and basolateral compartments. TER was evaluated at 1 and 3 hours (A, representative experiment with three independent samples. Bars represent mean  $\pm$  SD). SK-CO15 cells stably expressing non-silencing shRNA (NS) or shRNA targeting JAM-A (shJAM-A) were verified by immunoblot. SK-CO15 cells stably downregulated for JAM-A (shJAM-A) do not develop trans-epithelial resistance (TER) after four days of plating when compared to SK-CO15 cells stably expressing non-silencing shRNA (NS) (B, representative experiment with three independent samples. Bars represent mean  $\pm$  SD).

**Figure S2:** JAM-A (JA) co-immunoprecipitates with ZO-2 but not ZO-1 in intestinal epithelial cells. JAM-A immunoprecipitates from cell lysates prepared with a Triton X-100, Sodium deoxycholate and SDS based buffer (RIPA) revealed a 160 kDa ZO-2 immunoreactive band suggesting co-association between JAM-A and ZO-2, but did not reveal a 220 kDa ZO-1 immunoreactive band. Under the same conditions, ZO-2 immunoprecipitates revealed a 220 kDa ZO-1 immunoreactive band suggesting co-association between ZO-2 and ZO-1.

**Figure S3:** Sample qRT-PCR results verifying knockdown of targets in SK-CO15 cells used for in vitro permeability studies.

**Figure S4:** Additional PCR demonstrating lack of signal with alternate Rap2a primer pair. A common cDNA template and PCR master mix was prepared and then divided into four tubes containing specific primer pairs (A). Table outlining si/shRNA targets used in this study (B). Table outlining PCR primers used for PCR and qRT-PCR. Beta-actin was used as a housekeeping gene (C).

Figure S1

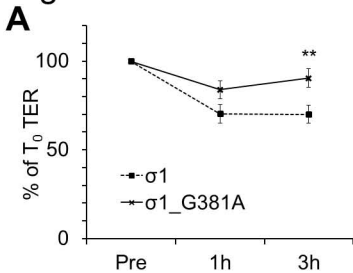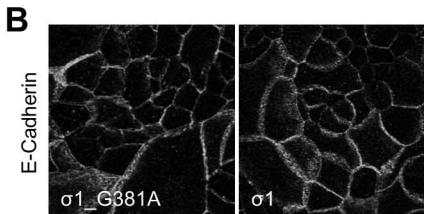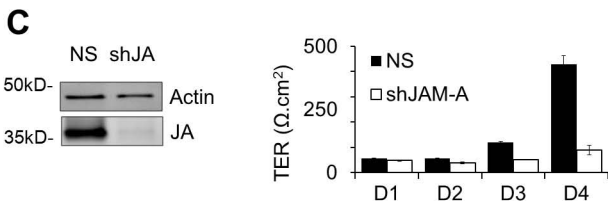

# Figure S2

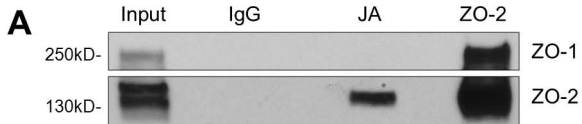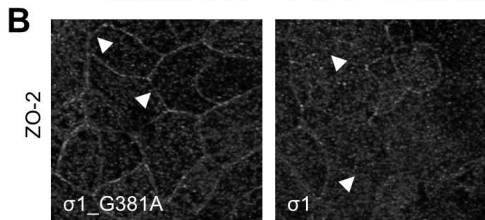

# Figure S3

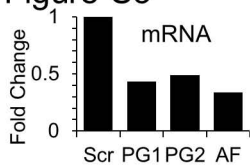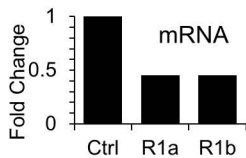

# Figure S4

**A**

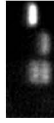

JAM-A  
Rap2c  
Rap2b  
Rap2a'

**B**

| Target    | si/shRNA sequences           |
|-----------|------------------------------|
| Rap1A     | 5'-GAUCAUUGUUUAUGAGAUATT-3'  |
| Rap1A'    | 5'-GCGAGUAGUUUGCAAAGAG-3'    |
| Rap1B     | 5'-CGAGUACUGUGGAUGAATT-3'    |
| Rap1B'    | 5'-GUAUUAUGUCUUAGAUAATT-3'   |
| Rap2B     | 5'-GGUGGUCUUAGUAUAUAATT-3'   |
| Rap2B'    | 5'-CACUUAAGUUUGAUUCAATT-3'   |
| Rap2C     | 5'-GGCUAAUUAACAAGGUAATT-3'   |
| Rap2C'    | 5'-UGUUCGUUUUAGAGACAAATT-3'  |
| PDZ-GEF1  | 5'-GGAAGAAAGUGCCCGUAAATT-3'  |
| PDZ-GEF1' | 5'-CCGCUACAUCUAUGAUCAGUAA-3' |
| PDZ-GEF2  | 5'-CUGCAUGAUUUGUAACUGAA3'    |
| PDZ-GEF2' | CAGGAAGAAGGGACAAAACA         |
| Afadin    | 5'-UGAGAAACCCUAGUUUGUA-3'    |
| Afadin'   | 5'-GUUAAGGGCCCCAAGACAUA-3'   |
| JAM-A     | 5'-GAAGUGAAGGAGAAUUCAATT-3'  |
| JAM-A'    | 5'-CGGGUGACCUCUUUGCCAATT-3'  |
| Scramble  | Proprietary (Qiagen, USA)    |
| shNS      | 5'-GGAATCTCATTGATGCATAC-3'   |
| shJAM-A   | 5'-TGAGAAATAATCCTGTGAAGTT-3' |
| shJAM-A'  | 5'-ACAACAGGAGAGCTGGTCTTT-3'  |

**C**

| Target      | Forward Primer                 | Reverse Primer                   |
|-------------|--------------------------------|----------------------------------|
| Rap1A       | 5'-GGCAAAGAGCAGGGCCAGAATT-3'   | 5'-CTAGAGCAGCAGACATGATTC-3'      |
| Rap1B       | 5'-GGGAAGGAACAAGGTCAAAATC-3'   | 5'-TTAAAGCAGCTGACATGATG-3'       |
| Rap2A       | 5'-CATGCTGTTCTGCATGTAAC-3'     | 5'-CAAGTTCTGCAGTGGAGTAG-3'       |
| Rap2A'      | 5'-TCCGCGTGAAGCGGTATGAGA-3'    | 5'-AGGGCTCTGCCTTCGCTGCA-3'       |
| Rap2B       | 5'-GGCCCTGGCTGAGGAGTGA-3'      | 5'-GAGGATCACGCAGGCCGAGC-3'       |
| Rap2C       | 5'-TGGCCATCCGAGCAGATAAACTCA-3' | 5'-ACAGGTTTACCAAGGCTCAGTTCTGC-3' |
| PDZ-GEF1    | 5'-AAATTCGTCAGTTGGCCGAATGG-3'  | 5'-ACTCCGCCATTTCTTCTCCCGAGT-3'   |
| PDZ-GEF2    | 5'-TGTGACTCCATGCTGCAGCTCT-3'   | 5'-ACCCAGGGCCATGTTGACTATGAT-3'   |
| Afadin      | 5'-CCGACATCATCCACCACCTGG-3'    | 5'-CAGCATTTCGCATATCAGGTCG-3'     |
| JAM-A       | 5'-GTTGTCCTGTGCCTACTCGG-3'     | 5'-CCGTGTCACGGACTTGAAGG-3'       |
| Beta-Acltin | 5'-TGACCCAGATCATGTTTGAGA-3'    | 5'-AGTCCATCACGATGCCAGT-3'        |
